# Supplementary material for: Discovering ligands for a microRNA precursor with peptoid microarrays
Source: PubMed Central journal article supplement — Nucleic Acids Res. 2009 Jun 26;37(16):5486–97. doi: 10.1093/nar/gkp549 (PMC2760809; doi:10.1093/nar/gkp549), 2009-06-26
Supplement: gkp549_1.pdf [file gkp549_1.pdf]

**Supplementary Data**  
**Discovering Ligands for a microRNA Precursor with Peptoid Microarrays**

Sara Chirayil, Rachel Chirayil, and Kevin J. Luebke\*  
*Division of Translational Research, Department of Internal Medicine,  
University of Texas Southwestern Medical Center, Dallas, Texas 75390-9185*

**Characterization of Compounds:** Each compound, **1-13**, was characterized by Matrix Assisted Laser Desorption Ionization (MALDI) mass spectrometry (Voyager DE Pro, ABI) using  $\alpha$ -cyano-4-hydroxycinnamic acid as matrix. Each compound was purified to a single peak by HPLC using the method described in Experimental Procedures.

**Table S1.** Compound characterization by MALDI-MS

| Compound  | Mass       |                             |
|-----------|------------|-----------------------------|
|           | Calculated | Found (m + H <sup>+</sup> ) |
| <b>1</b>  | 673.34     | 674.40                      |
| <b>2</b>  | 725.41     | 726.40                      |
| <b>3</b>  | 636.75     | 637.58                      |
| <b>4</b>  | 287.17     | 288.45                      |
| <b>5</b>  | 616.32     | 617.45                      |
| <b>6</b>  | 559.63     | 560.47                      |
| <b>7</b>  | 588.27     | 589.38                      |
| <b>8</b>  | 525.27     | 526.50                      |
| <b>9</b>  | 596.31     | 597.30                      |
| <b>10</b> | 643.30     | 644.45                      |
| <b>11</b> | 607.44     | 608.54                      |
| <b>12</b> | 673.34     | 674.40                      |
| <b>13</b> | 673.34     | 674.41                      |

## 2-Aminopurine Fluorescence, Isothermal Titration Calorimetry, and In-Line Probing Yield Equivalent Values for Dissociation Constants:

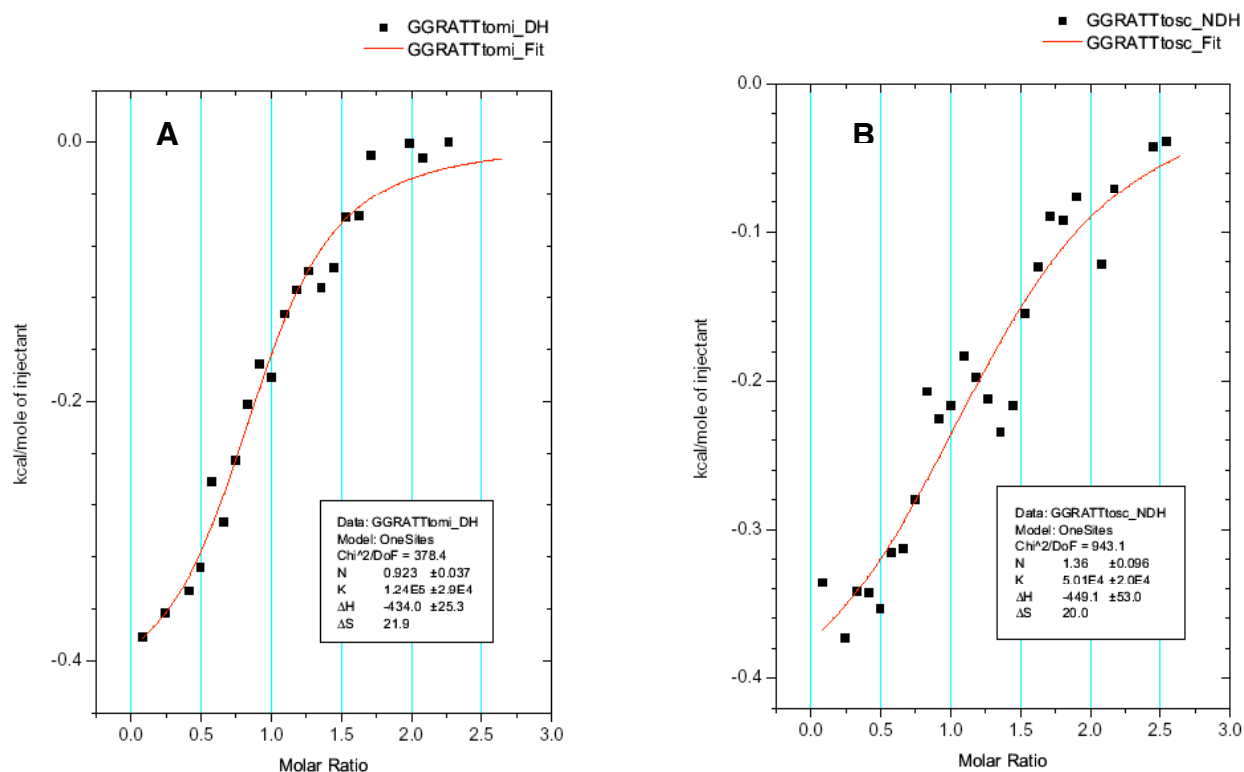

**Figure S1.** Isothermal titration calorimetry binding curves. ITC was carried out and data were analyzed as described in Experimental Procedures. (A) Association of RNA I with compound **2**. (B) Association of RNA II with compound **2**.

Dissociation constants for compound **2** with miR-21hp (RNA I) and control hp (RNA II) measured by monitoring 2-aminopurine fluorescence are equal, within experimental uncertainty, to those measured by ITC.

**Table S2.** Comparison of  $K_d$  Values Measured by ITC and 2-Aminopurine Fluorescence.

| RNA              | MiR-21hp (RNA I) |                | Control hp (RNA II) |              |
|------------------|------------------|----------------|---------------------|--------------|
|                  | ITC              | fluorescence   | ITC                 | fluorescence |
| $K_d$ ( $\mu$ M) | $8 \pm 2$        | $10.1 \pm 0.4$ | $20 \pm 8$          | $19 \pm 1$   |

Binding of Compounds **1** and **2** to miR-21hp was also assessed by the effects of the peptoids on  $Mg^{2+}$ -induced hydrolytic cleavage of the RNA (Figure 5C). The dissociation constants measured for **1** and **2** with miR-21hp using this analysis are compared to the dissociation constants measured by the 2-aminopurine fluorescence assay under the same conditions (10 mM KCl, 50 mM Tris, pH 8.5, 1 mM  $MgCl_2$ ) in Table S3. Measurements made for both compounds by the two different methods agree within experimental uncertainty.

**Table S3.** Comparison of  $K_d$  Values Measured by In-Line Probing ( $Mg^{2+}$ -Induced Cleavage) and 2-Aminopurine Fluorescence for Binding of **1** and **2** to MiR-21hp.

| Compound          | <b>1</b>     |                | <b>2</b>     |                |
|-------------------|--------------|----------------|--------------|----------------|
|                   | In-line      | fluorescence   | In-line      | fluorescence   |
| $K_d$ ( $\mu M$ ) | $251 \pm 52$ | $249 \pm 22^a$ | $164 \pm 13$ | $128 \pm 60^a$ |

<sup>a</sup>See representative binding curves in Figure S2.

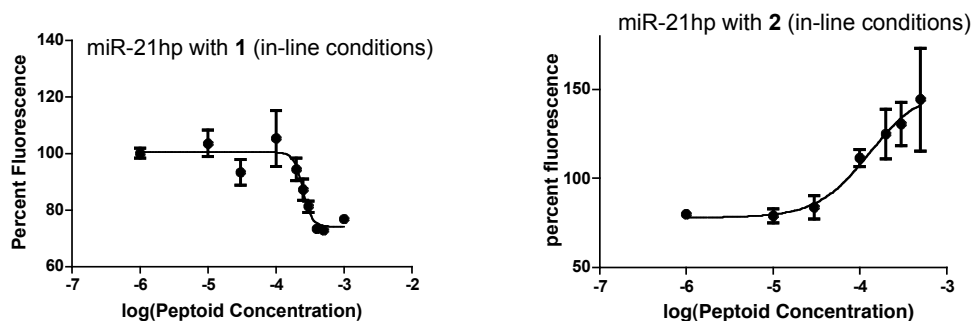

**Figure S2.** Representative binding curves for determination of dissociation constants by monitoring 2-aminopurine fluorescence as a function of peptoid concentration (M) under conditions of the in-line cleavage assay.

Thus, in all cases measured by two or more of the three assays, with both compounds **1** and **2** and RNA I and RNA II, the assays are in agreement. This agreement of multiple methods supports the validity of each. Most importantly, it supports the assumption that substitution of 2-aminopurine for adenine in the RNAs of this study does not perturb the binding interaction.
